# Supplementary material
Source: PubMed Central journal article supplement (PMC5479606)
Supplement: d111f7345b414ea61de83d9eed806a6a_2016_144808-Disclosures_and_Contributions.pdf [file d111f7345b414ea61de83d9eed806a6a_2016_144808-Disclosures_and_Contributions.pdf]

Haematologica  
HAEMATOL/2016/144808  
Version 4

Wnt5a is a key target for the pro-osteogenic effects of iron chelation on  
osteoblast progenitors

Ulrike Baschant, Martina Rauner, Ekaterina Bulycheva, Heike Weidner,  
Antonella Roetto, Uwe Platzbecker, and Lorenz C. Hofbauer

Disclosures: All authors declare that there is no conflict of interest.

Contributions: Study design: UB, MR, UP, LCH, study conduct: UB, MR, EB, HW, AR, Data collection, analysis, and interpretation: all authors, drafting manuscript: UB, MR, UP, LCH, revising manuscript content and approving final version of manuscript: all authors.
